# Supplementary material
Source: Springer Nature journal article supplement (https://www.springermedizin.de/resource/supplementary/12967_2011_972_MOESM1_ESM.pdf/9573172)
Supplement: MOESM1 [file 9573172]

595 eligible patients included in the clinical trial

FFPE tissue samples available:  
n = 367 (62% of the patients)

Insufficient tumor tissue on sections

At least one value for HER2 or TOP2A available:  
n = 352 (96% of the FFPE blocks)

Template abundance, method eligibility  
criteria

**CISH analysis**

HER2 n=285 (81%)  
TOP2A n=266 (76%)  
HER2/TOP2A n=266 (76%)

**qRT-PCR (mRNA expression)**

HER2 n=314 (89%)  
TOP2A n=314 (89%)  
HER2/TOP2A n=314 (89%)

**IHC analysis**

HER2 n=297 (84%)  
Topolla n=273 (78%)  
HER2/Topolla n=269 (76%)

**Profiled HER2 variables**

HER2 CISH/mRNA n=249 (70%)  
HER2 CISH/IHC n=278 (79%)  
HER2 mRNA/IHC n=261 (74%)  
HER2, all n=243 (69%)

**Profiled TOP2A variables**

TOP2A CISH/mRNA n=232 (66%)  
TOP2A CISH/IHC n=249 (70%)  
TOP2A mRNA/IHC n=240 (68%)  
TOP2A, all n=217 (62%)
